# Supplementary material for: High-strain slide-ring shape-memory polycaprolactone-based polyurethane
Source: Royal Society of Chemistry journal article supplement (doi:10.1039/c8sm00570b), 2018-01-01
Supplement: c8sm00570b2.pdf [file c8sm00570b2.pdf]

## Supplementary Information

### High-strain Slide-Ring Shape Memory Polycaprolactone-based Polyurethane

Ruiqing Wu,<sup>1,2</sup> Jingjuan Lai,<sup>1,2</sup> Yi Pan<sup>1</sup>, Zhaohui Zheng<sup>1</sup> & Xiaobin Ding<sup>1</sup>

<sup>1</sup>Chengdu Institute of Organic Chemistry, Chinese Academy of Sciences, Chengdu, 610041, China.

<sup>2</sup>University of Chinese Academy of Sciences, Beijing, 100081, China.

Correspondence and requests for materials should be addressed to X.D. (email: [xbding@cioc.ac.cn](mailto:xbding@cioc.ac.cn)).

#### The PEG ditosylates:

Polyethylene glycol (PEG,  $M_w = 20\ 000$  g/mol) (5.0 g, 0.250 mmol) was dissolved in  $\text{CH}_2\text{Cl}_2$  (30 mL) in a round-bottomed flask. The mixture was stirred for 10 min. p-TsCl (1.0 g, 10 mmol) and dimethylamino-pyridine (25 mg, 0.2 mmol) were then introduced into the solution. The reaction was stirred overnight, then concentrated to 5 mL and added dropwise to diethyl ether. The white precipitate was collected by filtration. The white precipitate was dried at room temperature under vacuum for 3 days.

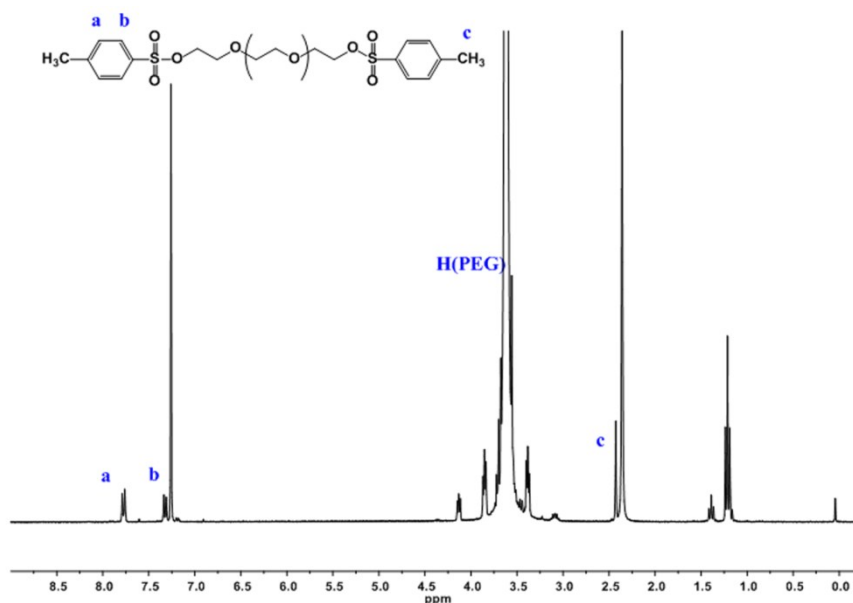

**Figure S1.**  $^1\text{H}$  NMR spectra of bis-tosyl-terminated PEG in  $\text{CDCl}_3$ .

### The $\alpha,\omega$ -ditosyl-terminated PEG polypseudorotaxanes:

An  $\alpha$ -CD aqueous solution (1 g, in 7 mL of  $\text{H}_2\text{O}$ ) was combined with an aqueous solution of bis-tosyl-terminated PEG (1 g, in 5 mL  $\text{H}_2\text{O}$ ) at room temperature. The clear mixed solution became turbid within 30 min and was allowed to stand overnight at 5  $^\circ\text{C}$ . Sticky mixture was freeze-dried to obtain the polypseudorotaxanes.

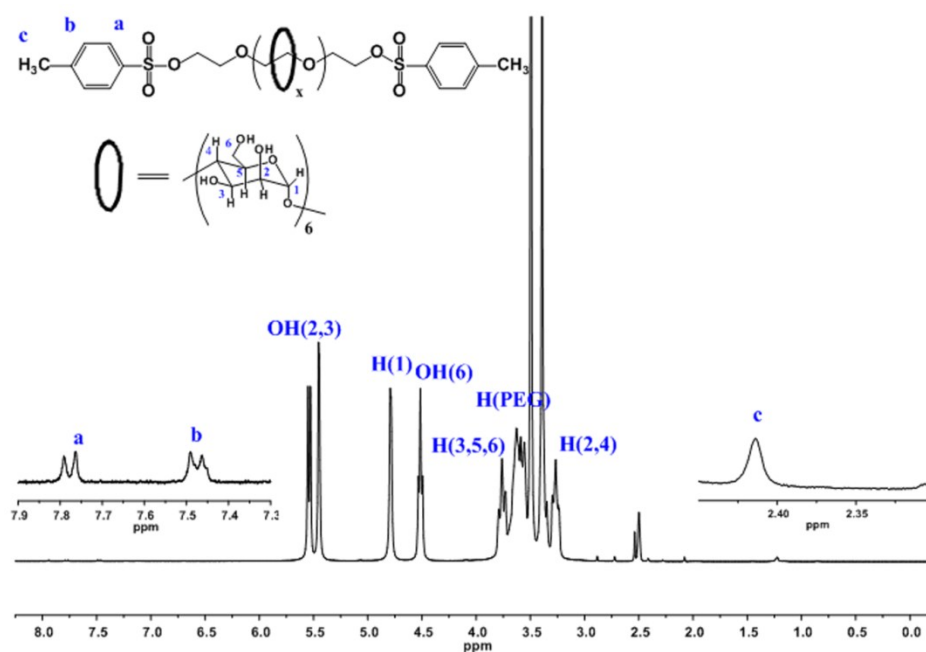

**Figure S2.**  $^1\text{H}$  NMR spectra of the  $\alpha,\omega$ -ditosyl-terminated PEG polypseudorotaxanes in  $\text{DMSO-d}_6$ .

### PEG polyrotaxanes:

A solution of 3, 5-dimethylphenol (0.86 g, 7.0 mmol) in DMF (10 mL) was slowly added to dry NaH (0.25 g) in a round-bottomed flask under a strong argon purge. The  $\alpha,\omega$ -ditosyl-terminated PEG polypseudorotaxanes (1.0 g) was then added to the reaction flask and rinsed down with 4 mL of DMF. After stirring overnight, the reaction mixture was poured into 60 mL of methanol. The precipitate was collected by filtration, washed with  $2 \times 20$  mL of methanol, dissolved in 6 mL of DMSO, and precipitated into 50 mL of methanol. The precipitate was again collected by filtration and washed with  $2 \times 20$  mL of methanol. Finally, the white solid product was dried at 110 °C overnight under vacuum.

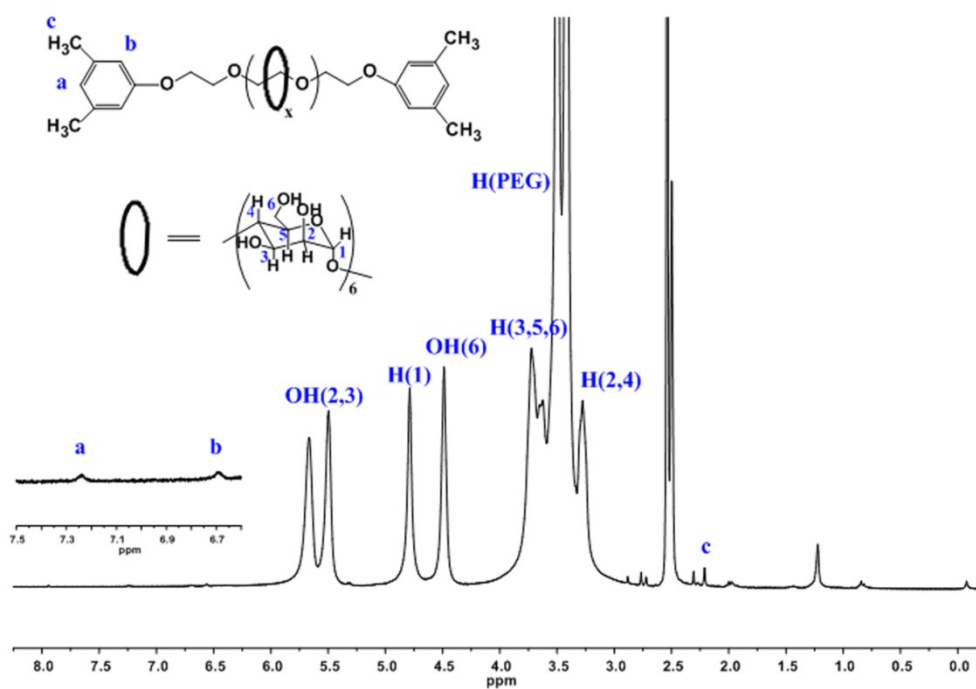

**Figure S3.**  $^1\text{H}$  NMR spectra of PEG polyrotaxanes in  $\text{DMSO-d}_6$  with TMS as an internal standard.

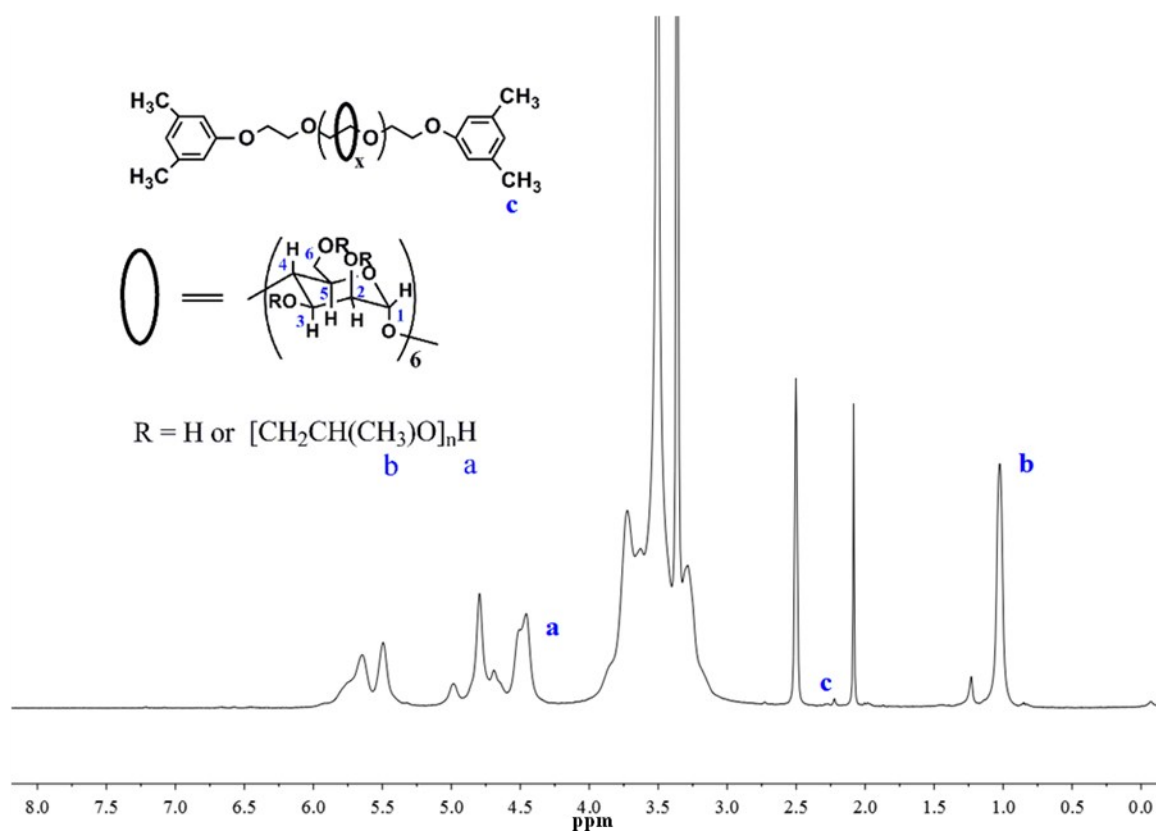

**Figure S4.**  $^1H$ -NMR spectra of HPPR in  $DMSO-d_6$  with TMS as an internal standard.

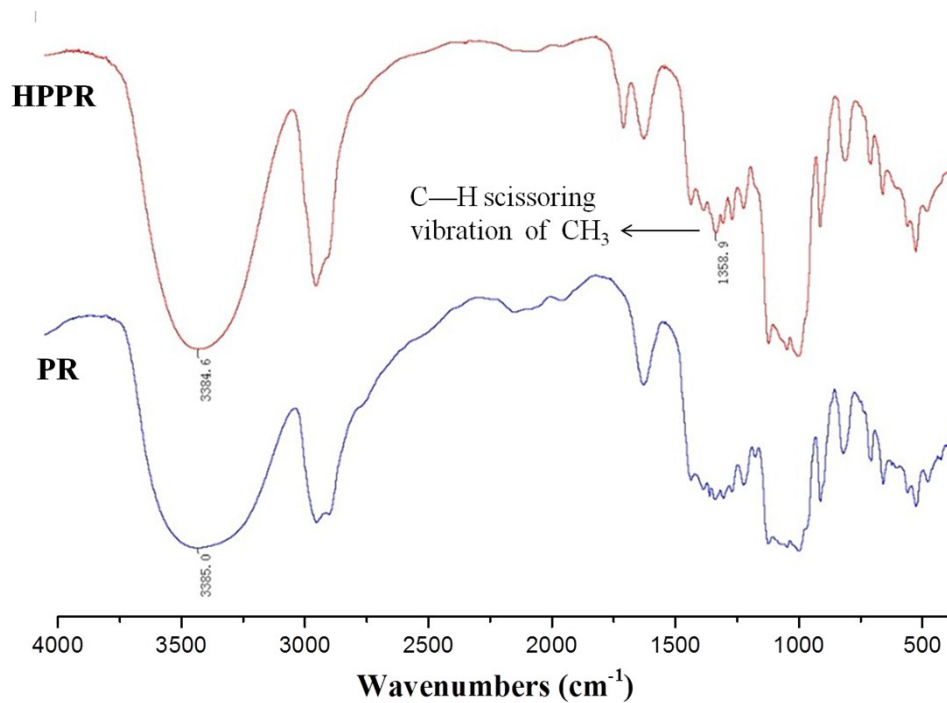

**Figure S5.** FT-IR spectra of PR and HPPR

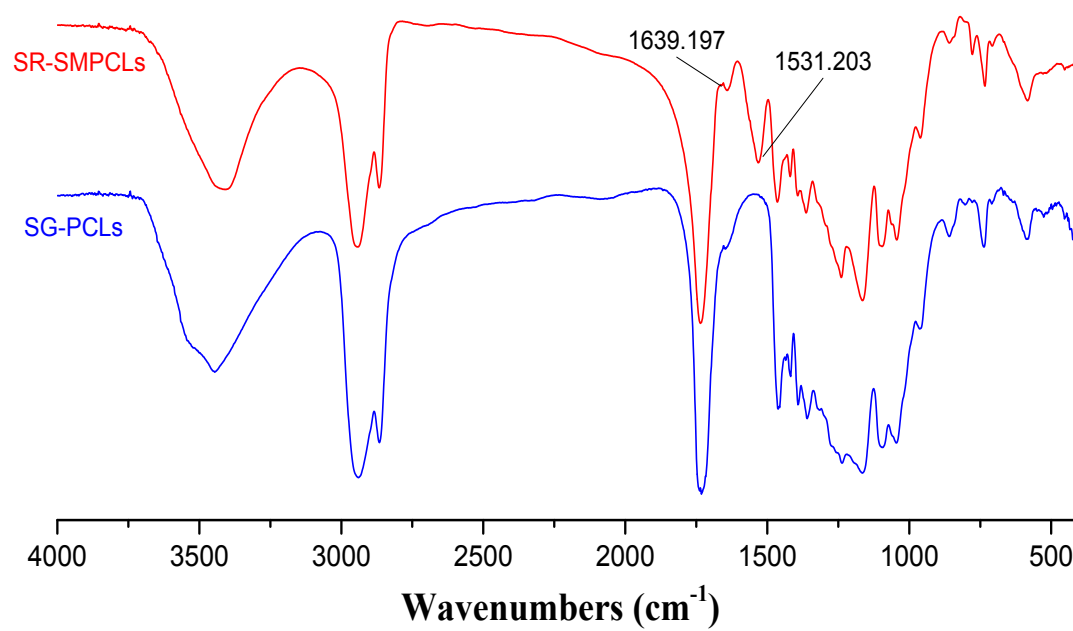

**Figure S6.** FT-IR spectra of sliding graft PCL (SG-PCLs) and slide-ring PUs (SR-SMPCLUs)

**Table S1.** Measured SME Parameters of the samples at different deformation strains

| Sample    | Strain | $\varepsilon_n$ (%) | $\varepsilon_m$ (%) | $\varepsilon_u$ (%) | $\varepsilon_p$ (%) | $R_f$ (%) | $R_r$ (%) | $V_r$ (%/min) |
|-----------|--------|---------------------|---------------------|---------------------|---------------------|-----------|-----------|---------------|
| SR-SMPCLU | 20%    | 0.169               | 21.40               | 21.17               | 0.642               | 98.92     | 97.43     | 46.01         |
|           | 40%    | 0.205               | 43.24               | 42.90               | 1.439               | 99.21     | 97.11     | 36.23         |
|           | 70%    | 0.46                | 65.24               | 64.88               | 0.66                | 99.44     | 99.69     | 33.04         |
|           | 100%   | 0.686               | 101.137             | 99.817              | 1.012               | 98.68     | 99.67     | 32.05         |
|           | 200%   | 0.325               | 215.80              | 213.00              | 1.305               | 98.70     | 99.54     | 25.00         |
|           | 300%   | 0.35                | 281.44              | 279.44              | 4.54                | 98.78     | 99.40     | 20.33         |
|           | 400%   | 0.212               | 376.38              | 374.38              | 2.20                | 99.47     | 99.41     | 17.99         |
|           | 600%   | 0                   | 600                 | 593.5               | 7.33                | 98.92     | 98.76     |               |
|           | 800%   | 0                   | 800                 | 788.2               | 21.20               | 98.53     | 97.31     |               |
|           | 1000%  | 0                   | 1000                | 985.4               | 30.25               | 98.54     | 96.93     |               |
| CC-SMPCLU | 1300%  | 0                   | 1300                | 1287.7              | 44.17               | 99.05     | 96.57     |               |
|           | 100%   | 0.3159              | 108.65              | 102.53              | 10.76               | 94.35     | 89.78     |               |
|           | 400%   | 1.2636              | 434.6               | 410.1               | 104.52              | 94.35     | 74.74     |               |
| L-PCLU    | 700%   | 0                   | 663                 | 636.94              | 140.38              | 96.07     | 77.96     |               |
|           | 50%    | 0.213               | 52.78               | 51.07               | 4.55                | 96.61     | 91.60     |               |
|           | 200%   | 0.52                | 256.90              | 255.7               | 58.91               | 99.53     | 77.12     |               |
|           | 800%   | 0                   | 795                 | 786.7               | 207.6               | 98.96     | 73.61     |               |

**Table S2.** Measured SME Parameters of the sample SR-SMPCLUs repeated for four cycles when  $\varepsilon_m$  was about 40%

| Cycle | $\varepsilon_n$ (%) | $\varepsilon_m$ (%) | $\varepsilon_u$ (%) | $\varepsilon_p$ (%) | $R_f$ (%) | $R_r$ (%) | $R_{r,adj}$ (%) | $V_r$ (%/min) |
|-------|---------------------|---------------------|---------------------|---------------------|-----------|-----------|-----------------|---------------|
| 1     | 0.316               | 40.49               | 40.15               | 0.862               | 99.15     | 98.63     | 98.63           | 38.07         |
| 2     | 0.862               | 43.94               | 43.6                | 1.584               | 99.21     | 98.31     | 97.07           | 35.71         |
| 3     | 1.584               | 46.17               | 45.95               | 2.574               | 99.51     | 97.77     | 95.05           | 41.67         |
| 4     | 2.574               | 48.759              | 48.549              | 3.238               | 99.55     | 98.56     | 93.94           | 38.27         |

**Table S3.** Measured SME Parameters of the sample SR-SMPCLUs repeated for six cycles when  $\varepsilon_m$  was about 280%

| <b>Cycle</b> | <b><math>\varepsilon_n(\%)</math></b> | <b><math>\varepsilon_m(\%)</math></b> | <b><math>\varepsilon_u(\%)</math></b> | <b><math>\varepsilon_p(\%)</math></b> | <b><math>R_f(\%)</math></b> | <b><math>R_r(\%)</math></b> | <b><math>R_{r.adj}(\%)</math></b> | <b><math>V_r(\%/min)</math></b> |
|--------------|---------------------------------------|---------------------------------------|---------------------------------------|---------------------------------------|-----------------------------|-----------------------------|-----------------------------------|---------------------------------|
| <b>1</b>     | 0.71                                  | 278.60                                | 273.30                                | 9.50                                  | <b>98.09</b>                | <b>96.78</b>                | <b>96.78</b>                      | <b>7.03</b>                     |
| <b>2</b>     | 9.50                                  | 287.39                                | 284.09                                | 10.01                                 | <b>98.81</b>                | <b>99.81</b>                | <b>96.72</b>                      | <b>20.27</b>                    |
| <b>3</b>     | 10.01                                 | 280.03                                | 278.63                                | 10.88                                 | <b>99.81</b>                | <b>99.68</b>                | <b>96.34</b>                      | <b>20.27</b>                    |
| <b>4</b>     | 10.88                                 | 292.02                                | 290.02                                | 12.78                                 | <b>99.29</b>                | <b>99.32</b>                | <b>95.83</b>                      | <b>20.27</b>                    |
| <b>5</b>     | 12.78                                 | 271                                   | 268.7                                 | 13.57                                 | <b>99.11</b>                | <b>99.69</b>                | <b>95.20</b>                      | <b>20.66</b>                    |
| <b>6</b>     | 13.57                                 | 291.87                                | 289.97                                | 15.47                                 | <b>98.96</b>                | <b>99.67</b>                | <b>94.90</b>                      | <b>20.27</b>                    |

**Table S4.** Measured SME Parameters of the sample L-PCLU repeated for four cycles

| <b>Cycle</b> | <b><math>\varepsilon_n(\%)</math></b> | <b><math>\varepsilon_m(\%)</math></b> | <b><math>\varepsilon_u(\%)</math></b> | <b><math>\varepsilon_p(\%)</math></b> | <b><math>R_f(\%)</math></b> | <b><math>R_r(\%)</math></b> | <b><math>R_{r.adj}(\%)</math></b> | <b><math>V_r(\%/min)</math></b>                                                       |
|--------------|---------------------------------------|---------------------------------------|---------------------------------------|---------------------------------------|-----------------------------|-----------------------------|-----------------------------------|---------------------------------------------------------------------------------------|
| <b>1</b>     | 0.52                                  | 256.90                                | 255.7                                 | 58.91                                 | <b>99.53</b>                | <b>77.12</b>                | <b>77.12</b>                      | 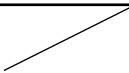 |
| <b>2</b>     | 58.91                                 | 280.00                                | 277.74                                | 84.63                                 | <b>98.98</b>                | <b>88.25</b>                | <b>69.66</b>                      |                                                                                       |
| <b>3</b>     | 84.63                                 | 310.45                                | 310.17                                | 111.26                                | <b>99.87</b>                | <b>88.19</b>                | <b>64.24</b>                      |                                                                                       |
| <b>4</b>     | 111.26                                | 343.90                                | 343.62                                | 138.74                                | <b>99.88</b>                | <b>84.57</b>                | <b>59.71</b>                      |                                                                                       |

**Table S5.** Measured SME Parameters of the sample CC-SMPCLU repeated for four cycles

| <b>Cycle</b> | <b><math>\epsilon_n(\%)</math></b> | <b><math>\epsilon_m(\%)</math></b> | <b><math>\epsilon_u(\%)</math></b> | <b><math>\epsilon_p(\%)</math></b> | <b><math>R_f(\%)</math></b> | <b><math>R_r(\%)</math></b> | <b><math>R_{r.adj}(\%)</math></b> | <b><math>V_r(\%/min)</math></b>                                                       |
|--------------|------------------------------------|------------------------------------|------------------------------------|------------------------------------|-----------------------------|-----------------------------|-----------------------------------|---------------------------------------------------------------------------------------|
| <b>1</b>     | 0.76                               | 259.8                              | 246.1                              | 51.9                               | <b>94.70</b>                | <b>79.15</b>                | <b>79.15</b>                      | 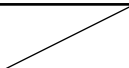 |
| <b>2</b>     | 51.9                               | 273.80                             | 258.24                             | 82.51                              | <b>92.99</b>                | <b>85.17</b>                | <b>68.25</b>                      |                                                                                       |
| <b>3</b>     | 82.51                              | 298.69                             | 288.32                             | 117.50                             | <b>95.20</b>                | <b>83.00</b>                | <b>59.40</b>                      |                                                                                       |
| <b>4</b>     | 117.50                             | 338.62                             | 327.25                             | 139.03                             | <b>94.86</b>                | <b>89.94</b>                | <b>57.65</b>                      |                                                                                       |

### Supplementary Video S1

Actual observation of the shape recovery of panda pattern film made of SR-SMPCLU from a stretched temporary shape to permanent shape at preset 65 °C water bath



within 1 second.
